# Supplementary material for: Influence of Citrus Rootstocks on Scion Growth, Hormone Levels, and Metabolites Profile of ‘Shatangju’ Mandarin (Citrus reticulata Blanco)
Source: MDPI journal article supplement (doi:10.3390/horticulturae8070608), 2022-07-06
Supplement: s1 [file s1]

Archive with 1 entries (1 files):
- horticulturae-1759549-supplementary.pdf
