# Supplementary figures and images for: Influence of Citrus Rootstocks on Scion Growth, Hormone Levels, and Metabolites Profile of ‘Shatangju’ Mandarin (Citrus reticulata Blanco)
Source: MDPI journal article supplement (doi:10.3390/horticulturae8070608), 2022-07-06

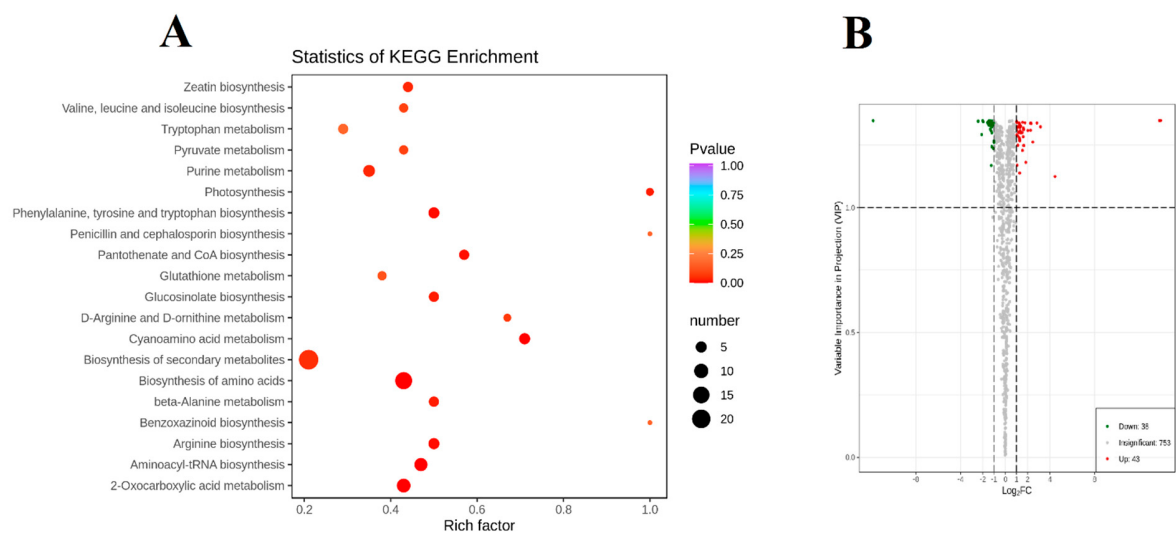

**Figure S1.** KEGG enrichment analysis (A) and volcano plot (B).

Supplement: s1 [file s1 › horticulturae-1759549-supplementary.pdf]
